# Supplementary material for: The salt-based catalytic enhancement of CO2 absorption by a tertiary amine medium
Source: Royal Society of Chemistry journal article supplement (doi:10.1039/c6ra13978g), 2016-01-01

## Supporting Information

### **The Salt-Based Catalytic Enhancement of CO<sub>2</sub> Absorption by a Tertiary Amine Medium**

Dharmalingam Sivanesan<sup>a</sup>, Young Eun Kim<sup>a</sup>, Min Hye Youn<sup>a</sup>, Ki Tae Park<sup>a</sup>, Hak-Joo Kim<sup>a</sup>, Andrews  
Nirmala Grace<sup>b,\*</sup>, Soon Kwan Jeong<sup>a,\*</sup>

<sup>a</sup>Green Energy Process Laboratory, Korea Institute of Energy Research, 152, Gajeong-ro, Yuseong-gu,  
Daejeon 305-343, Korea.

<sup>b</sup>Centre for Nanotechnology Research, VIT University, Vellore 632014, Tamil Nadu, India.

## Contents

| Entry | Title                                                                                                                         | Page No |
|-------|-------------------------------------------------------------------------------------------------------------------------------|---------|
| 1     | Scheme S1: Synthesis of <b>1</b>                                                                                              | S4      |
| 2     | Scheme S2: Synthesis of <b>3</b>                                                                                              | S4      |
| 3     | Table 1. Crystal data and structure refinement for <b>2</b>                                                                   | S5      |
| 4     | Table 2. Bond lengths [ $\text{\AA}$ ] and angles [ $^\circ$ ] for <b>2</b>                                                   | S6      |
| 5     | Fig. S1. Single crystal X-ray structure of <b>1</b> with weak hydrogen bonding between the nitrate anion and protonated amine | S8      |
| 6     | Fig. S2. FT-IR spectra of catalysts <b>1-3</b> . Top ( <b>1</b> ), middle ( <b>2</b> ) and bottom ( <b>3</b> )                | S9      |
| 7     | Fig. S3. $^{13}\text{C}$ NMR spectra of MDEA, MDEA with $\text{CO}_2$ , and MDEA with <b>1</b> and $\text{CO}_2$              | S10     |
| 8     | Fig S4. $^1\text{H}$ NMR spectrum of A                                                                                        | S11     |
| 9     | Fig. S5. $^1\text{H}$ NMR spectrum of B                                                                                       | S11     |
| 10    | Fig. S6. $^1\text{H}$ NMR spectrum of C                                                                                       | S12     |
| 11    | Fig. S7. $^1\text{H}$ NMR spectrum of <b>2</b>                                                                                | S12     |
| 12    | Fig. S8. $^1\text{H}$ NMR spectrum of D                                                                                       | S13     |
| 13    | Fig. S9. $^1\text{H}$ NMR spectrum of E                                                                                       | S13     |
| 14    | Fig. S10. $^1\text{H}$ NMR spectrum of F                                                                                      | S14     |
| 15    | Fig. S11. $^1\text{H}$ NMR spectrum of <b>1</b>                                                                               | S14     |
| 16    | Fig. S12. $^1\text{H}$ NMR spectrum of G                                                                                      | S15     |
| 17    | Fig. S13. $^1\text{H}$ NMR spectrum of H                                                                                      | S15     |
| 18    | Fig. S14. $^1\text{H}$ NMR spectrum of I                                                                                      | S16     |
| 19    | Fig. S15. $^1\text{H}$ NMR spectrum of <b>3</b>                                                                               | S16     |

## Synthesis of catalysts

**Synthesis of intermediate A:** To a solution of N1-(2-aminoethyl)-N1-methylethane-1,2-diamine (2.00 g, 17.0 mmol) in EtOH, 3-nitrobenzaldehyde (5.15 g, 34.1 mmol) was added under N<sub>2</sub> atmosphere and heated at 60 °C for 12 h. After cooling to room temperature, resulting yellow crystals were filtered and dried. Yield = 5.12 g, 92 %. To a solution of imine (4.00 g, 10.4 mmol) in MeOH, NaBH<sub>4</sub> (1.57 g, 41.7 mmol) was added and stirred at RT for 12 h under N<sub>2</sub> atmosphere. After completion of the reaction, monitored by TLC, MeOH was reduced under reduced pressure and it was diluted with CH<sub>2</sub>Cl<sub>2</sub> and DM water. The organic layer was dried over Na<sub>2</sub>SO<sub>4</sub> and concentrated under vacuum. It afforded yellow sticky mass which was dried under high vacuum. Yield = 3.99 g, 99%. <sup>1</sup>H NMR (400 MHz, Chloroform-*d*) δ 8.21 (s, 2H), 8.14 – 8.00 (m, 2H), 7.66 (dd, *J* = 7.6, 0.8 Hz, 2H), 7.47 (t, *J* = 7.9 Hz, 2H), 3.91 (s, 4H), 2.72 (dd, *J* = 6.5, 5.3 Hz, 4H), 2.54 (dd, *J* = 6.4, 5.4 Hz, 4H), 2.21 (s, 3H), 2.06 (s, 4H).

**Synthesis of intermediate B:** To a solution of intermediate A (4.50 g, 11.2 mmol) in CH<sub>3</sub>CN (120 mL) and acetic acid (30 mL), formaldehyde solution (16.6 mL) was added and stirred for 2 h. NaBH<sub>4</sub> (2.49 g, 67.0 mmol) was added pinch by pinch at 0 °C and this temperature was maintained for 2 h and continued the stirring at RT for 12 h. The white precipitate was filtered and the filtrate was concentrated under vacuum. The filtrate pH was adjusted to basic with NaOH solution and the yellow solution was extracted with CH<sub>2</sub>Cl<sub>2</sub>. The organic layer was dried over Na<sub>2</sub>SO<sub>4</sub> and concentrated under reduced pressure. Yield = 4.00 g, 83%. <sup>1</sup>H NMR (400 MHz, Chloroform-*d*) δ 8.20 (t, *J* = 1.9 Hz, 2H), 8.09 (ddd, *J* = 8.2, 2.4, 1.1 Hz, 2H), 7.66 (ddd, *J* = 7.7, 1.8, 1.0 Hz, 2H), 7.47 (t, *J* = 7.9 Hz, 2H), 3.61 (s, 4H), 2.55 (q, *J* = 2.8 Hz, 8H), 2.24 (s, 3H), 2.23 (s, 6H).

**Synthesis of intermediate C:** To a mixture of Pd/C (0.274 g) and B (2.74 g, 93.1 mmol) in EtOH (55 mL), hydrazine hydrate (30.0 mL) was added under N<sub>2</sub> atmosphere. Then mixture temperature was slowly increased to 60 °C at this temperature stirred for 8 h. After cooling to RT, the mixture was filtered using celite bed and concentrated under vacuum. Resulting colorless liquid was extracted with CH<sub>2</sub>Cl<sub>2</sub> and dried over Na<sub>2</sub>SO<sub>4</sub> and concentrated. Yield = 1.20 g, 45%. ESI-Mass: (M+1= 356.02). <sup>1</sup>H NMR (400 MHz, Chloroform-*d*) δ 7.14 – 7.04 (m, 2H), 6.73 – 6.65 (m, 4H), 6.60 – 6.55 (m, 2H), 3.43 (s, 4H), 2.65 – 2.46 (m, 8H), 2.25 (s, 3H), 2.22 (s, 6H).

**Synthesis of 2:** To a solution of C (0.300 g) in EtOH (15 mL) 0.1 M HNO<sub>3</sub> solution was added and stirred for 12 h. The solvents were removed under reduced pressure and resulting light yellow solution was triturated with diethylether to get as light yellow solid. Yield = 0.289 g, 71%. <sup>1</sup>H NMR (400 MHz, DMSO-*d*<sub>6</sub>) δ 7.00 (t, *J* = 7.6 Hz, 2H), 6.57 – 6.46 (m, 6H), 5.15 (s, 4H), 3.57 (s, 4H), 2.98 (m, 4H), 2.73 (s, 2H), 2.53 – 2.43 (m, 2H), 2.29 (s, 9H). <sup>13</sup>C NMR (101 MHz, DMSO) δ 147.25, 129.37, 118.02, 117.36, 115.42, 113.85, 51.92, 46.50, 42.88, 41.93, 36.24.

**Synthesis of 1:** Similar synthetic procedure of **2** was followed to synthesis **1** from 2-nitrobenzaldehyde. Scheme S1 (Amine) Yield = 0.221 g, 47%. ESI-Mass: (M+Na = 378.02)  $^1\text{H}$  NMR (400 MHz, DMSO- $d_6$ )  $\delta$  6.97 (td,  $J = 7.6, 1.6$  Hz, 2H), 6.90 (dd,  $J = 7.4, 1.6$  Hz, 2H), 6.60 (dd,  $J = 7.9, 1.2$  Hz, 2H), 6.48 (td,  $J = 7.3, 1.2$  Hz, 2H), 5.29 (s, 4H), 3.33 (s, 4H), 2.55 – 2.33 (m, 8H), 2.12 (d,  $J = 2.4$  Hz, 3H), 2.06 (s, 6H). (Amine salt - **1**): Yield = 0.350 g, 86%.  $^1\text{H}$  NMR (300 MHz, Chloroform- $d$ )  $\delta$  7.15 (d,  $J = 3.9$  Hz, 2H), 6.98 (dt,  $J = 7.5, 2.0$  Hz, 2H), 6.88 (d,  $J = 7.7$  Hz, 2H), 6.62 – 6.43 (m, 2H), 3.37 (s, 4H), 2.47 – 2.34 (m, 8H), 2.15 – 2.00 (m, 9H).  $^{13}\text{C}$  NMR (75 MHz,  $\text{CDCl}_3$ )  $\delta$  147.05, 135.93, 129.06, 122.90, 116.37, 62.17, 54.88, 41.94, 36.64, 33.75.

**Synthesis of 3 :** Similar synthetic procedure of **2** was followed to synthesis the ligand from 4-nitrobenzaldehyde. Scheme S2 (Amine) Yield = 0.363 g, 87%. ESI-Mass: (M+Na = 378.02).  $^1\text{H}$  NMR (300 MHz, Chloroform- $d$ )  $\delta$  7.00 (d,  $J = 8.0$  Hz, 4H), 6.55 (d,  $J = 8.3$  Hz, 4H), 3.60 (s, 4H), 2.42 (td,  $J = 6.4, 2.7$  Hz, 8H), 2.13 (s, 3H), 2.11 (s, 6H).  $^{13}\text{C}$  NMR (75 MHz,  $\text{CDCl}_3$ )  $\delta$  131.33, 128.35, 115.97, 113.95, 99.98, 77.49, 65.02, 55.59, 46.59, 41.59, 34.06. (Amine salt – **3**): Yield = 0.387 g, 95 %.  $^1\text{H}$  NMR (300 MHz, DMSO- $d_6$ )  $\delta$  7.10 – 6.92 (m, 4H), 6.54 (dd,  $J = 17.8, 9.7$  Hz, 4H), 5.11 (s, 4H), 3.89 (s, 4H), 2.99 (m, 4H), 2.68 (m, 4H), 2.39 (s, 3H), 2.26 (s, 6H).  $^{13}\text{C}$  NMR (75 MHz, DMSO)  $\delta$  148.99, 131.45, 130.05, 121.51, 118.99, 115.73, 66.08, 56.64, 51.25, 44.90, 36.14.

Scheme S1: Synthesis of 1

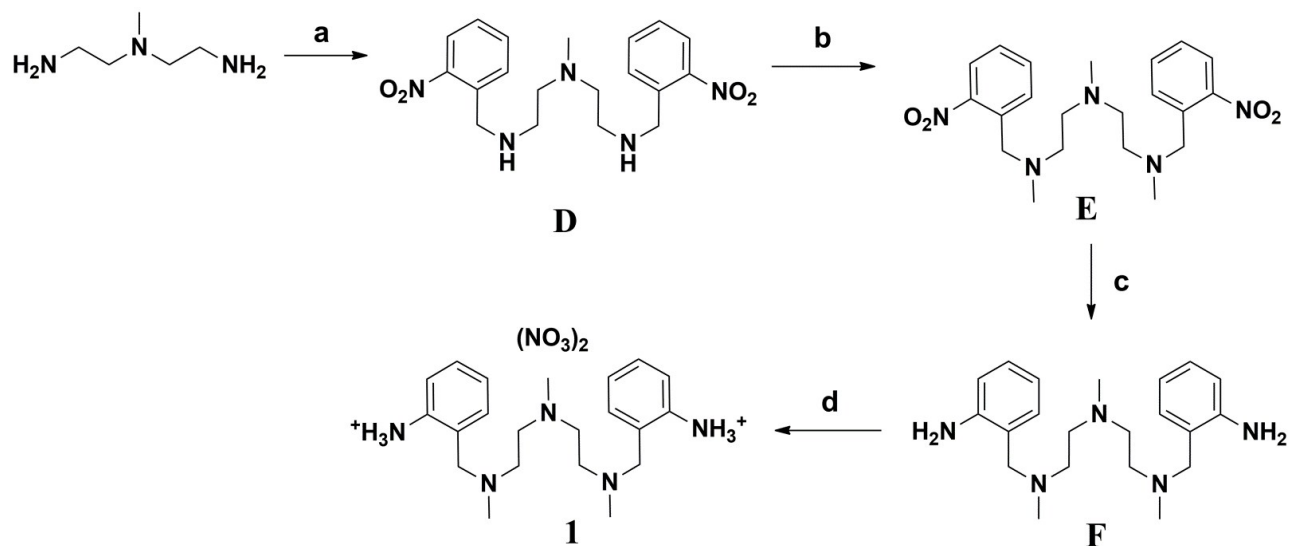

**Reagents:** a. 2-nitrobenzaldehyde, EtOH,  $\text{NaBH}_4$ , MeOH b.  $\text{HCHO}$ ,  $\text{NaBH}_4$ ,  $\text{CH}_3\text{CN}/\text{AcOH}$  c. Pd/C, Hydrazine hydrate d.  $0.1 \text{ M HNO}_3$

Scheme S2: Synthesis of 3

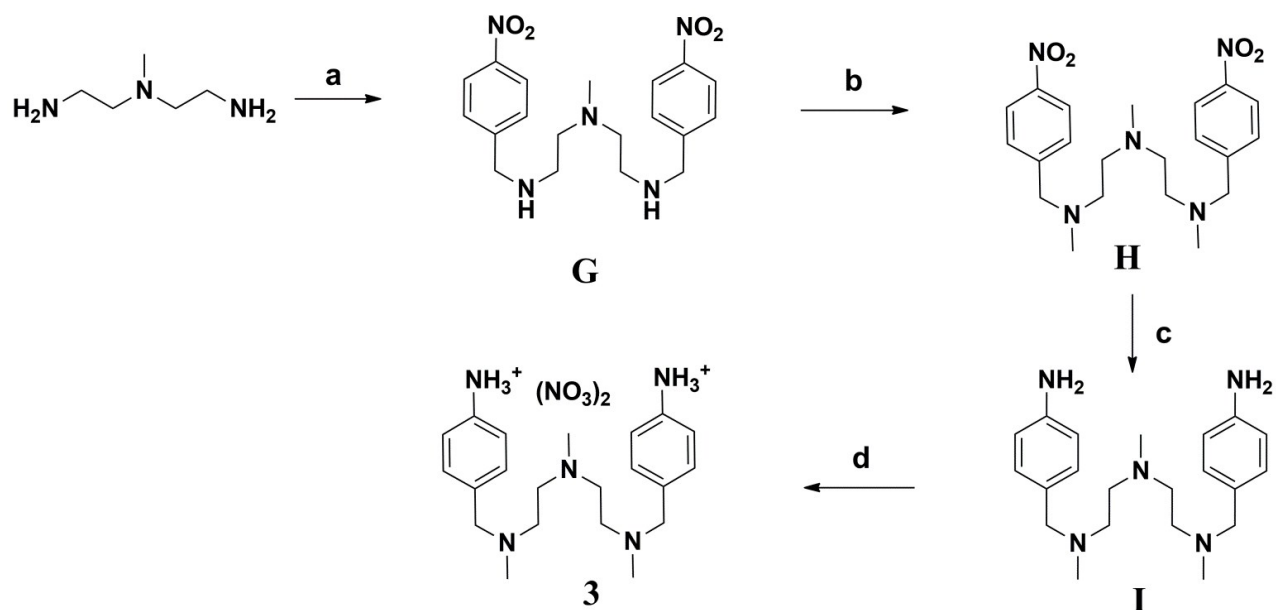

**Reagents:** a. 4-nitrobenzaldehyde, EtOH,  $\text{NaBH}_4$ , MeOH b.  $\text{HCHO}$ ,  $\text{NaBH}_4$ ,  $\text{CH}_3\text{CN}/\text{AcOH}$  c. Pd/C, Hydrazine hydrate d.  $0.1 \text{ M HNO}_3$

**Table 1.** Crystal data and structure refinement for **2**

|                                   |                                                               |         |
|-----------------------------------|---------------------------------------------------------------|---------|
| CCDC number                       | 1454963                                                       |         |
| Empirical formula                 | C <sub>21</sub> H <sub>35</sub> N <sub>7</sub> O <sub>6</sub> |         |
| Formula weight                    | 481.56                                                        |         |
| Temperature                       | 273(2) K                                                      |         |
| Wavelength                        | 0.71073 Å                                                     |         |
| Crystal system                    | Orthorhombic                                                  |         |
| Space group                       | Pna2(1)                                                       |         |
| Unit cell dimensions              | a = 14.3139(5) Å                                              | α = 90° |
|                                   | b = 16.8590(5) Å                                              | β = 90° |
|                                   | c = 10.2559(4) Å                                              | γ = 90° |
| Volume                            | 2474.93(15) Å <sup>3</sup>                                    |         |
| Z                                 | 4                                                             |         |
| Density (calculated)              | 1.292 Mg/m <sup>3</sup>                                       |         |
| Absorption coefficient            | 0.096 mm <sup>-1</sup>                                        |         |
| F(000)                            | 1032                                                          |         |
| Crystal size                      | 0.17 x 0.14 x 0.11 mm <sup>3</sup>                            |         |
| Theta range for data collection   | 2.73 to 27.94°.                                               |         |
| Index ranges                      | -18 ≤ h ≤ 18, -21 ≤ k ≤ 22, -13 ≤ l ≤ 13                      |         |
| Reflections collected             | 52356                                                         |         |
| Independent reflections           | 5894 [R(int) = 0.0340]                                        |         |
| Completeness to theta = 27.94°    | 99.3 %                                                        |         |
| Absorption correction             | None                                                          |         |
| Refinement method                 | Full-matrix least-squares on F <sup>2</sup>                   |         |
| Data / restraints / parameters    | 5894 / 1 / 312                                                |         |
| Goodness-of-fit on F <sup>2</sup> | 0.755                                                         |         |
| Final R indices [I > 2σ(I)]       | R1 = 0.0380, wR2 = 0.0998                                     |         |
| R indices (all data)              | R1 = 0.0450, wR2 = 0.1074                                     |         |
| Absolute structure parameter      | 0.2(8)                                                        |         |
| Largest diff. peak and hole       | 0.504 and -0.432 e.Å <sup>-3</sup>                            |         |

**Table 2.** Bond lengths [Å] and angles [°] for **2**

| Bond lengths [Å] |            | Bond angles [°]   |            |
|------------------|------------|-------------------|------------|
| N(1)-C(2)        | 1.463(2)   | C(2)-N(1)-C(3)    | 109.47(12) |
| N(1)-C(3)        | 1.468(2)   | C(2)-N(1)-C(1)    | 111.20(13) |
| N(1)-C(1)        | 1.464(2)   | C(3)-N(1)-C(1)    | 111.39(13) |
| N(7)-O(4)        | 1.237(2)   | O(4)-N(7)-O(6)    | 120.89(14) |
| N(7)-O(6)        | 1.248(2)   | O(4)-N(7)-O(5)    | 120.40(15) |
| N(7)-O(5)        | 1.2567(19) | O(6)-N(7)-O(5)    | 118.70(15) |
| N(6)-O(2)        | 1.231(2)   | O(2)-N(6)-O(1)    | 122.05(16) |
| N(6)-O(1)        | 1.241(2)   | O(2)-N(6)-O(3)    | 119.12(15) |
| N(6)-O(3)        | 1.2775(19) | O(1)-N(6)-O(3)    | 118.83(15) |
| N(2)-C(6)        | 1.492(2)   | C(6)-N(2)-C(4)    | 111.07(14) |
| N(2)-C(4)        | 1.506(2)   | C(6)-N(2)-C(8)    | 110.22(13) |
| N(2)-C(8)        | 1.519(2)   | C(4)-N(2)-C(8)    | 111.78(13) |
| N(3)-C(7)        | 1.499(2)   | C(7)-N(3)-C(5)    | 111.15(13) |
| N(3)-C(5)        | 1.506(2)   | C(7)-N(3)-C(15)   | 108.74(13) |
| N(3)-C(15)       | 1.522(2)   | C(5)-N(3)-C(15)   | 113.25(13) |
| N(4)-C(13)       | 1.373(2)   | N(1)-C(3)-C(5)    | 111.97(13) |
| N(5)-C(20)       | 1.380(2)   | N(1)-C(2)-C(4)    | 112.10(13) |
| C(3)-C(5)        | 1.519(2)   | C(9)-C(8)-N(2)    | 111.64(13) |
| C(2)-C(4)        | 1.522(2)   | N(2)-C(4)-C(2)    | 111.78(13) |
| C(8)-C(9)        | 1.510(2)   | N(3)-C(5)-C(3)    | 111.47(13) |
| C(9)-C(14)       | 1.390(2)   | C(14)-C(9)-C(10)  | 120.32(16) |
| C(9)-C(10)       | 1.394(3)   | C(14)-C(9)-C(8)   | 119.91(16) |
| C(14)-C(13)      | 1.404(2)   | C(10)-C(9)-C(8)   | 119.76(16) |
| C(13)-C(12)      | 1.405(3)   | C(9)-C(14)-C(13)  | 120.92(17) |
| C(12)-C(11)      | 1.386(3)   | N(4)-C(13)-C(12)  | 121.37(16) |
| C(10)-C(11)      | 1.390(3)   | N(4)-C(13)-C(14)  | 120.19(16) |
| C(16)-C(21)      | 1.387(2)   | C(12)-C(13)-C(14) | 118.33(16) |
| C(16)-C(17)      | 1.397(2)   | C(11)-C(12)-C(13) | 120.13(17) |
| C(16)-C(15)      | 1.502(2)   | C(11)-C(10)-C(9)  | 118.90(17) |
| C(21)-C(20)      | 1.396(2)   | C(10)-C(11)-C(12) | 121.37(17) |
| C(20)-C(19)      | 1.405(2)   | C(21)-C(16)-C(17) | 119.79(16) |
| C(17)-C(18)      | 1.392(3)   | C(21)-C(16)-C(15) | 119.49(15) |

|             |            |                   |            |
|-------------|------------|-------------------|------------|
| C(18)-C(19) | 1.386(3)   | C(17)-C(16)-C(15) | 120.70(16) |
| N(1)-C(2)   | 1.463(2)   | C(16)-C(21)-C(20) | 121.64(15) |
| N(1)-C(3)   | 1.468(2)   | N(5)-C(20)-C(21)  | 120.18(16) |
| N(1)-C(1)   | 1.464(2)   | N(5)-C(20)-C(19)  | 121.48(16) |
| N(7)-O(4)   | 1.237(2)   | C(21)-C(20)-C(19) | 118.32(16) |
| N(7)-O(6)   | 1.248(2)   | C(16)-C(17)-C(18) | 118.85(17) |
| N(7)-O(5)   | 1.2567(19) | C(16)-C(15)-N(3)  | 113.21(14) |
| N(6)-O(2)   | 1.231(2)   | C(19)-C(18)-C(17) | 121.48(17) |
| N(6)-O(1)   | 1.241(2)   | C(18)-C(19)-C(20) | 119.89(17) |
| N(6)-O(3)   | 1.2775(19) | C(2)-N(1)-C(3)    | 109.47(12) |
| N(2)-C(6)   | 1.492(2)   | C(2)-N(1)-C(1)    | 111.20(13) |
| N(2)-C(4)   | 1.506(2)   | C(3)-N(1)-C(1)    | 111.39(13) |
| N(2)-C(8)   | 1.519(2)   | O(4)-N(7)-O(6)    | 120.89(14) |
| N(3)-C(7)   | 1.499(2)   | O(4)-N(7)-O(5)    | 120.40(15) |
| N(3)-C(5)   | 1.506(2)   | O(6)-N(7)-O(5)    | 118.70(15) |
| N(3)-C(15)  | 1.522(2)   | O(2)-N(6)-O(1)    | 122.05(16) |
| N(4)-C(13)  | 1.373(2)   | O(2)-N(6)-O(3)    | 119.12(15) |
| N(5)-C(20)  | 1.380(2)   | O(1)-N(6)-O(3)    | 118.83(15) |
| C(3)-C(5)   | 1.519(2)   | C(6)-N(2)-C(4)    | 111.07(14) |
| C(2)-C(4)   | 1.522(2)   | C(6)-N(2)-C(8)    | 110.22(13) |
| C(8)-C(9)   | 1.510(2)   | C(4)-N(2)-C(8)    | 111.78(13) |
| C(9)-C(14)  | 1.390(2)   | C(7)-N(3)-C(5)    | 111.15(13) |
| C(9)-C(10)  | 1.394(3)   | C(7)-N(3)-C(15)   | 108.74(13) |
| C(14)-C(13) | 1.404(2)   | C(5)-N(3)-C(15)   | 113.25(13) |
| C(13)-C(12) | 1.405(3)   | N(1)-C(3)-C(5)    | 111.97(13) |
| C(12)-C(11) | 1.386(3)   | N(1)-C(2)-C(4)    | 112.10(13) |
| C(10)-C(11) | 1.390(3)   | C(9)-C(8)-N(2)    | 111.64(13) |
| C(16)-C(21) | 1.387(2)   | N(2)-C(4)-C(2)    | 111.78(13) |
| C(16)-C(17) | 1.397(2)   | N(3)-C(5)-C(3)    | 111.47(13) |
| C(16)-C(15) | 1.502(2)   | C(14)-C(9)-C(10)  | 120.32(16) |
| C(21)-C(20) | 1.396(2)   | C(14)-C(9)-C(8)   | 119.91(16) |
| C(20)-C(19) | 1.405(2)   | C(10)-C(9)-C(8)   | 119.76(16) |
| C(17)-C(18) | 1.392(3)   | C(9)-C(14)-C(13)  | 120.92(17) |
| C(18)-C(19) | 1.386(3)   | N(4)-C(13)-C(12)  | 121.37(16) |

Symmetry transformations used to generate equivalent atoms:



**Fig. S1.** Single crystal X-ray structure of **1** with weak hydrogen bonding between the nitrate anion and protonated amine

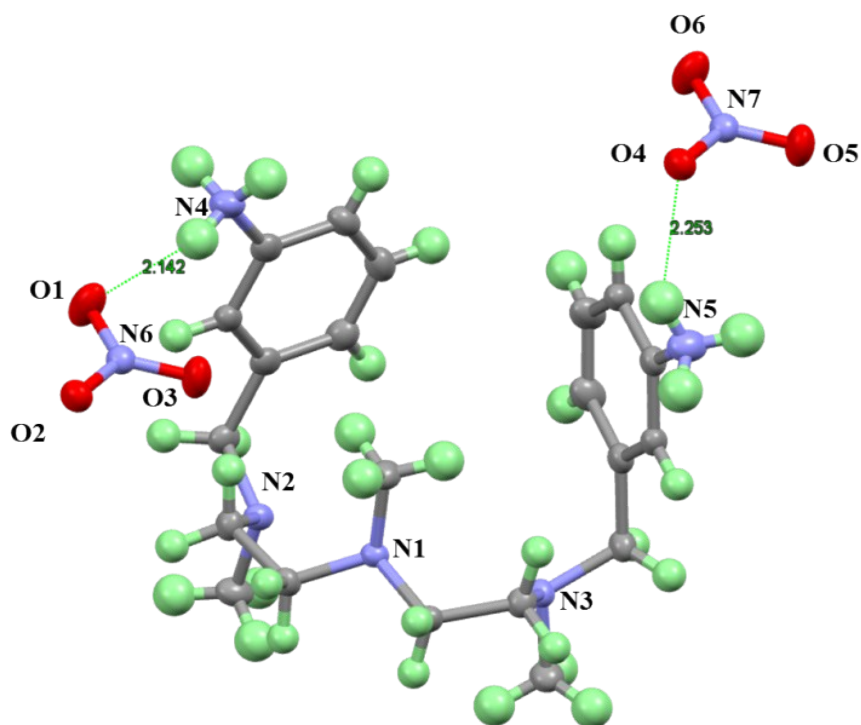

**Fig. S2.** FT-IR spectra of catalysts **1-3**. Top (**1**), middle (**2**) and bottom (**3**)

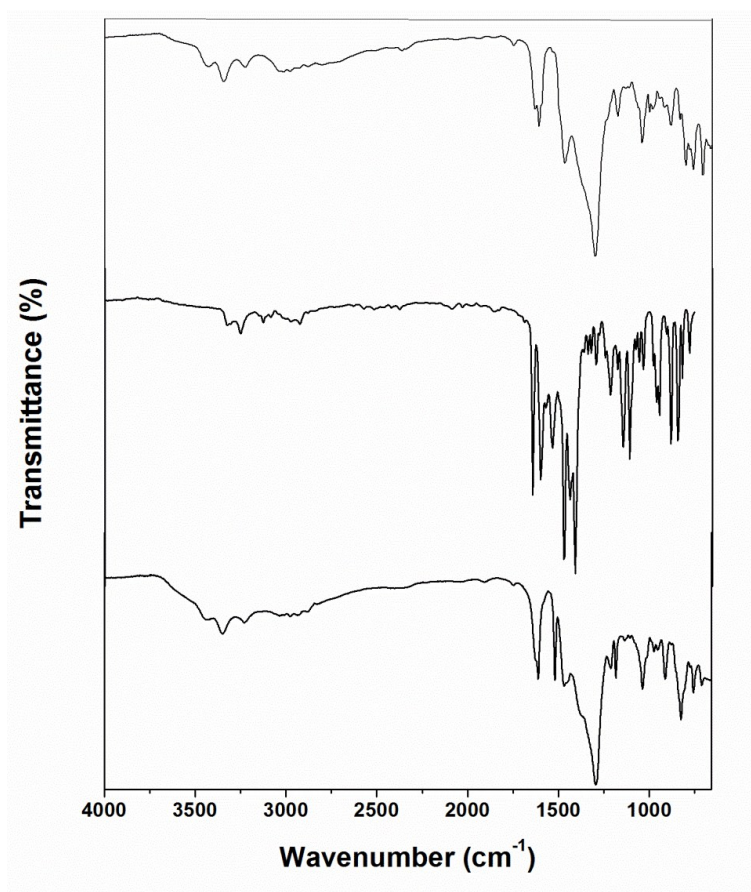

Fig. S3.  $^{13}\text{C}$  NMR spectra of MDEA, MDEA with  $\text{CO}_2$ , and MDEA with **1** and  $\text{CO}_2$  in  $\text{D}_2\text{O}$

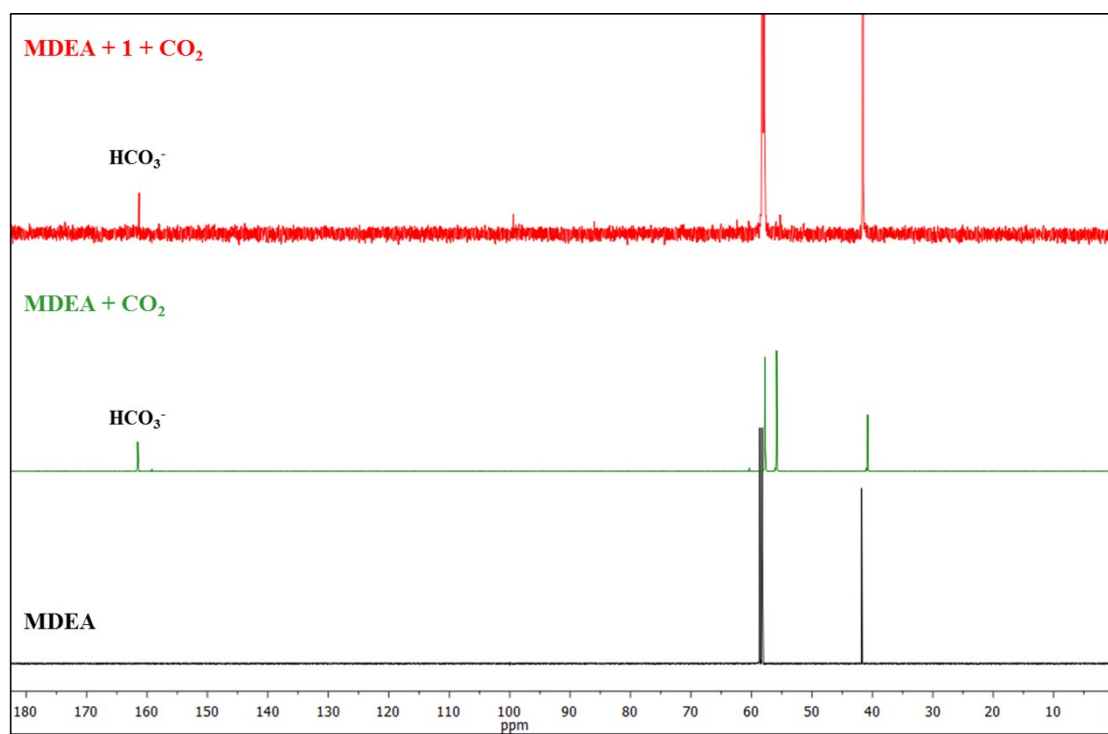

Fig S4:  $^1\text{H}$  NMR spectrum of A

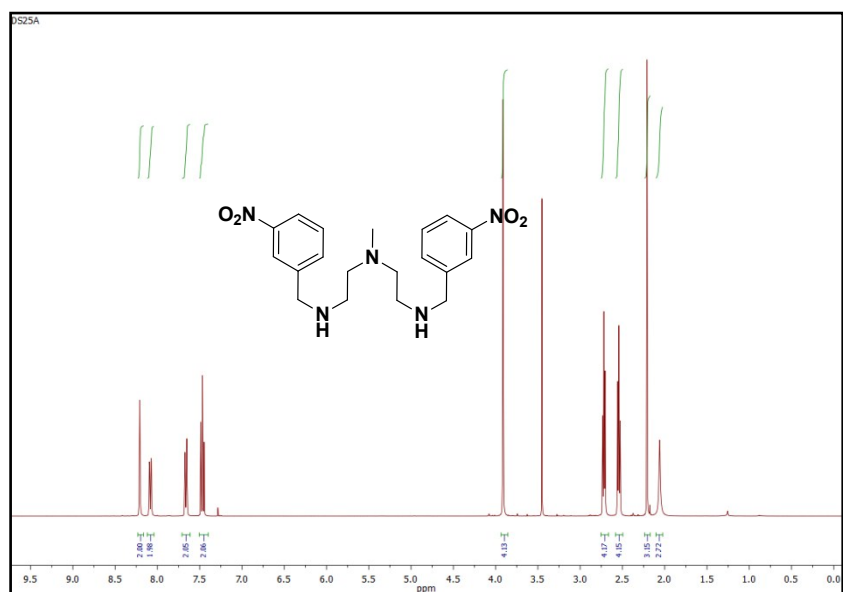

Fig. S5:  $^1\text{H}$  NMR spectrum of B

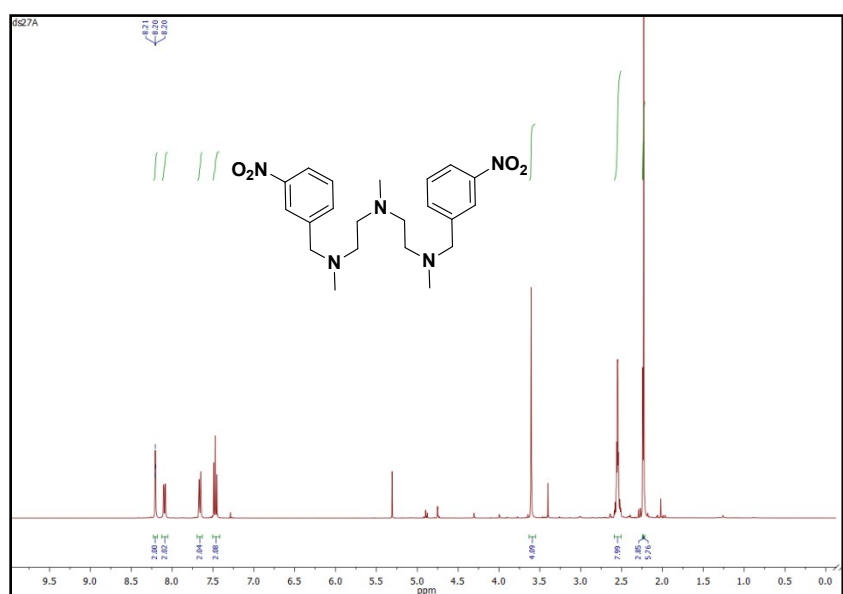

**Fig. S6.**  $^1\text{H}$  NMR spectrum of **C**

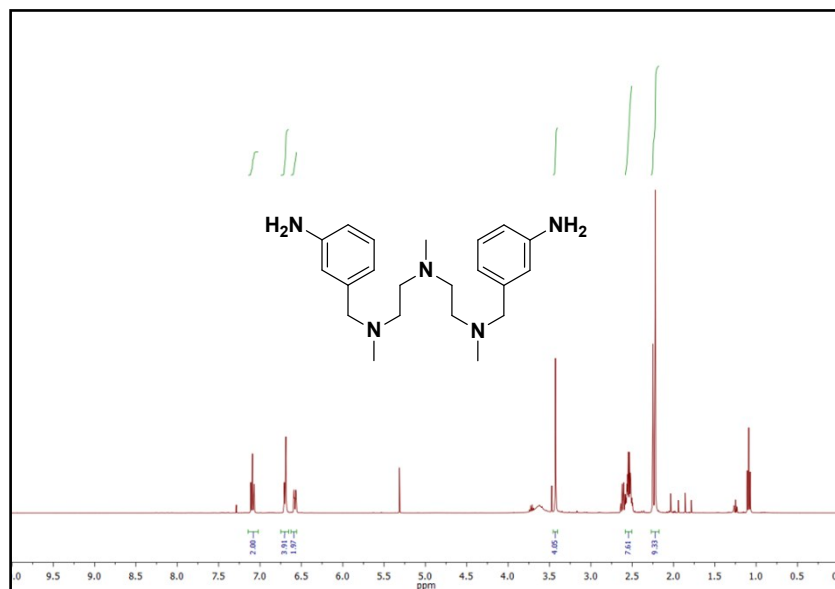

**Fig. S7.**  $^1\text{H}$  NMR spectrum of **2**, (diethyl ether ( $\delta$  1.11 & 3.41) and ethyl alcohol ( $\delta$  1.11 & 3.41) in DMSO- $d_6$ )

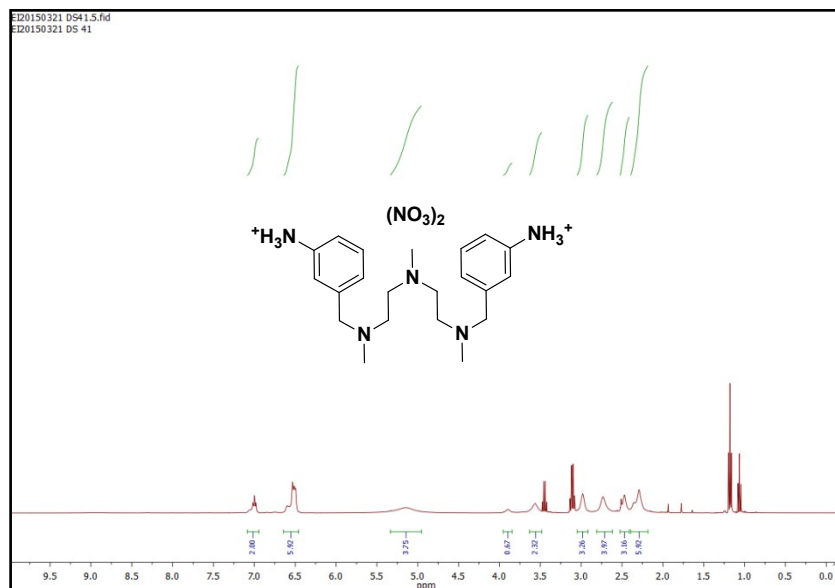

Fig. S8. <sup>1</sup>H NMR spectrum of D

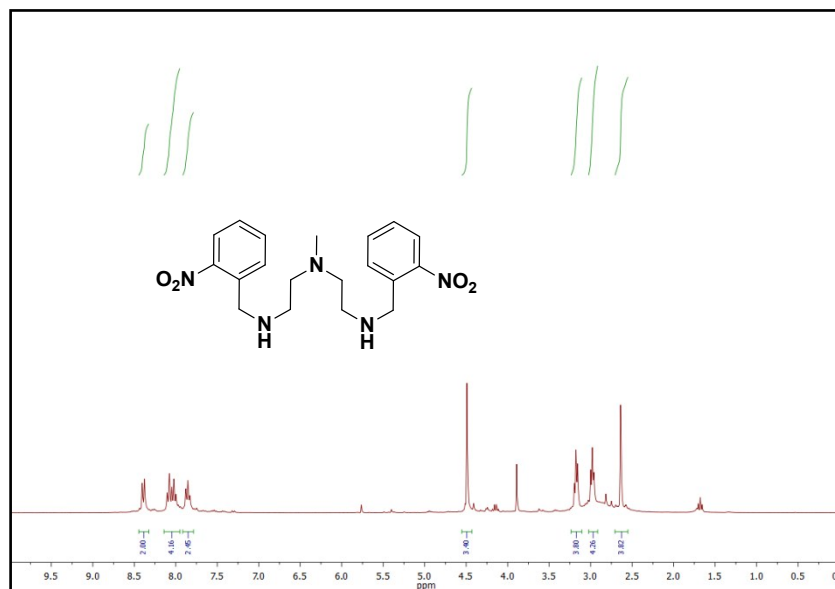

Fig. S9. <sup>1</sup>H NMR spectrum of E

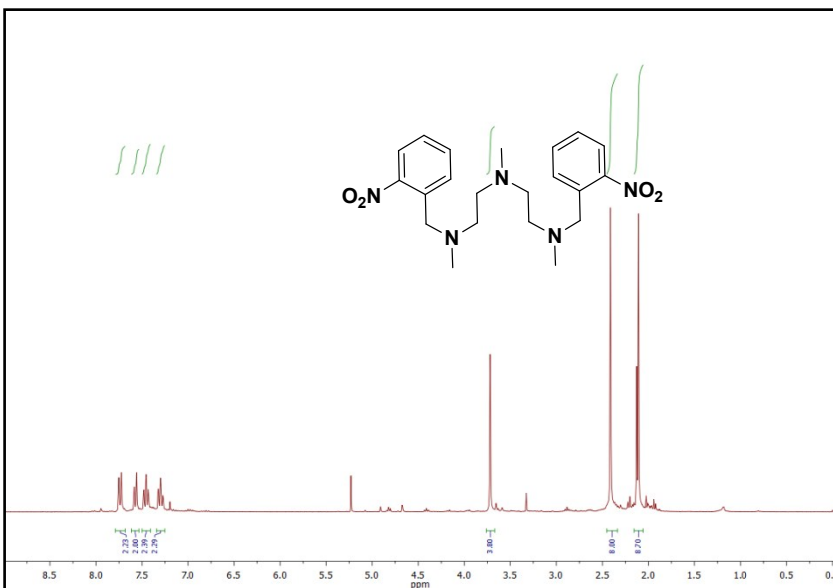

Fig. S10.  $^1\text{H}$  NMR spectrum of F

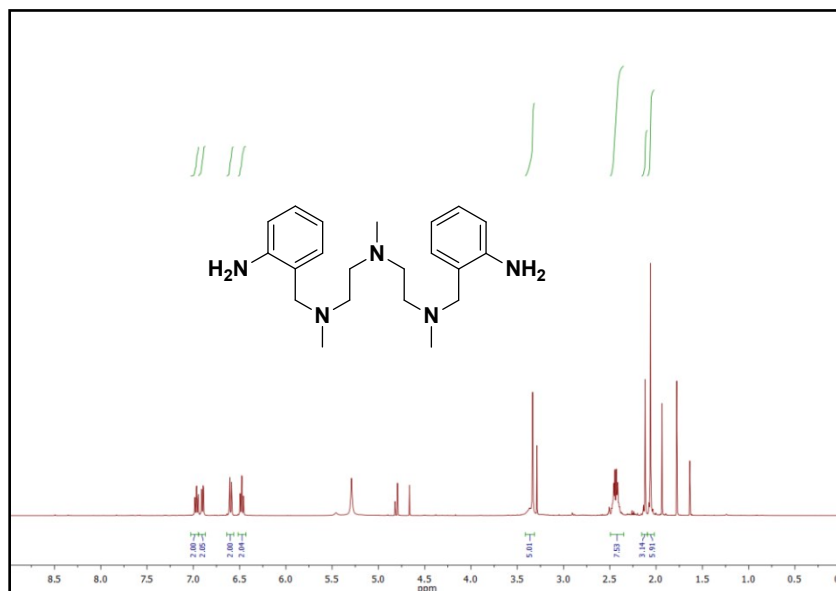

Fig. S11.  $^1\text{H}$  NMR spectrum of 1

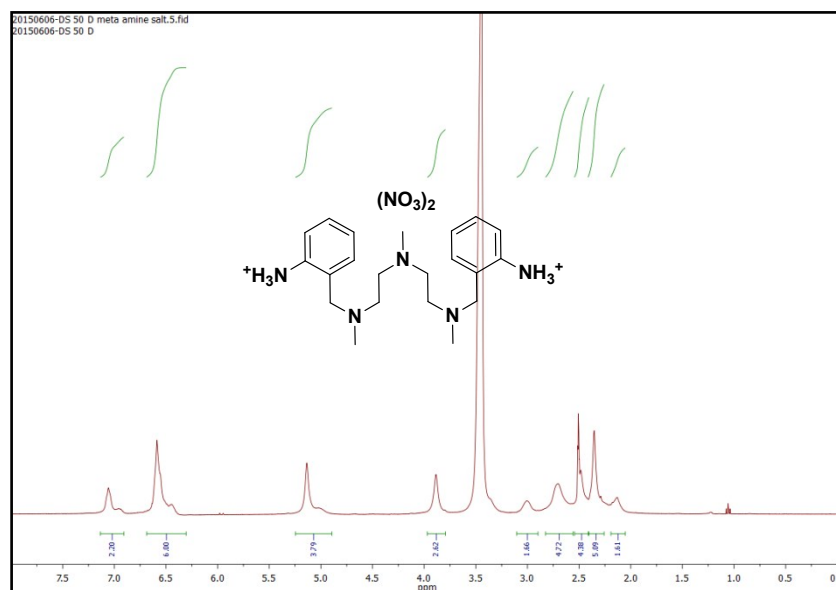

Fig. S12.  $^1\text{H}$  NMR spectrum of G

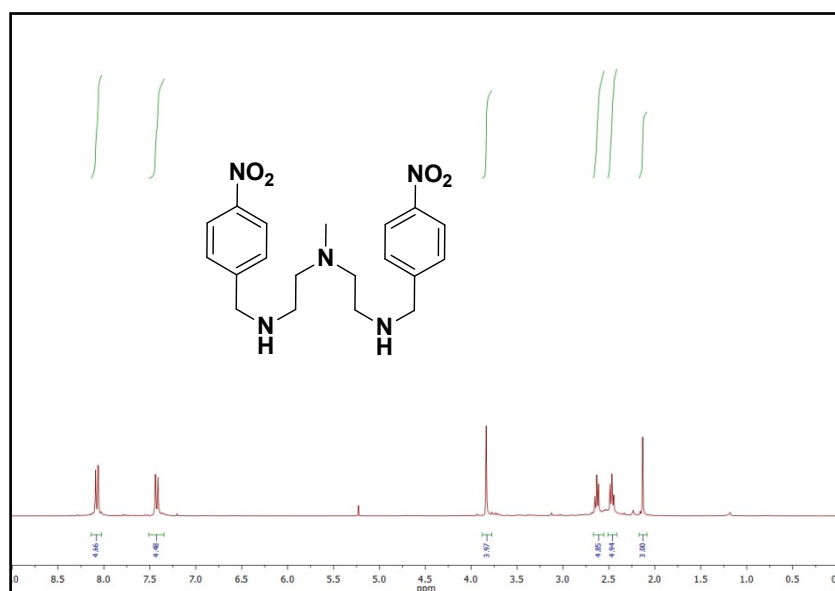

Fig. S13.  $^1\text{H}$  NMR spectrum of H

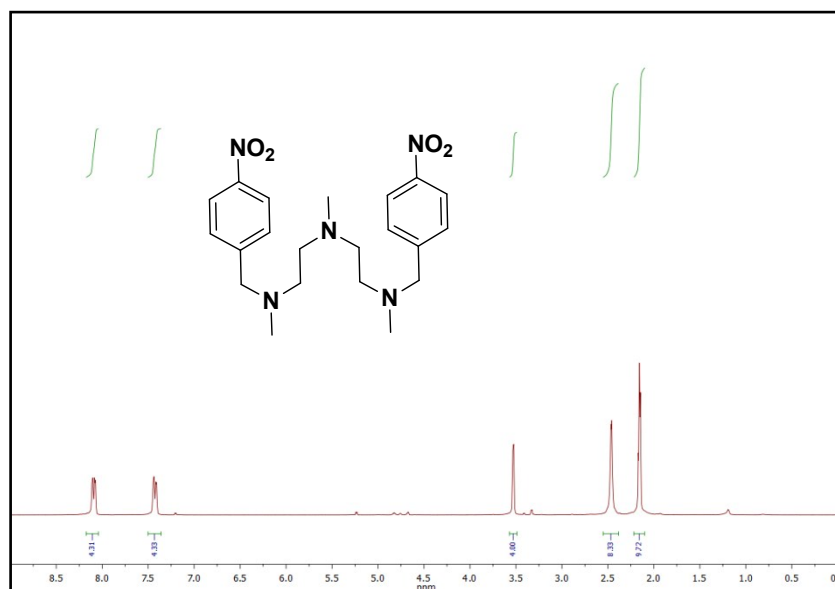



Fig. S14.  $^1\text{H}$  NMR spectrum of I

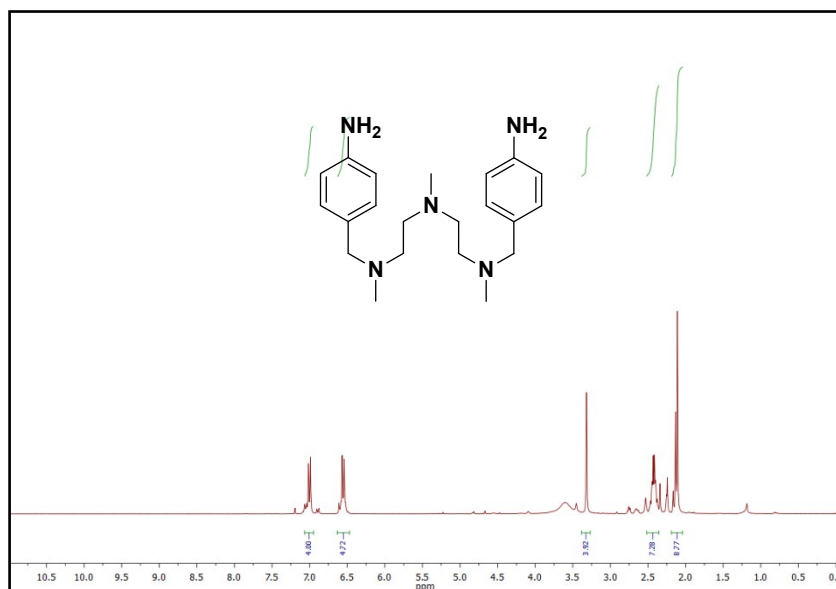

Fig. S15.  $^1\text{H}$  NMR spectrum of **3** (diethyl ether ( $\delta$  1.11 & 3.41) in DMSO- $d_6$ )

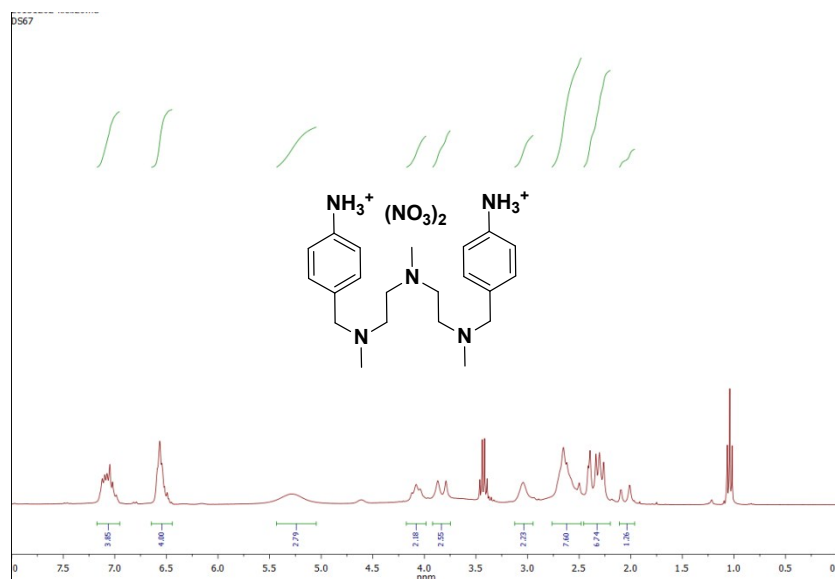

Supplement: c6ra13978g1.pdf [file c6ra13978g1.pdf]
